# Supplementary material for: Ancient DNA extraction from bones and teeth
Source: Springer Nature journal article supplement (doi:10.1038/nprot.2007.247), 2007-07-01
Supplement: 41596_2007_BFnprot2007247_MOESM270_ESM.pdf [file 41596_2007_BFnprot2007247_MOESM270_ESM.pdf]

| sample information |             |                       |                                            |           | amplification information |              |              |               |                     | citation                |             |
|--------------------|-------------|-----------------------|--------------------------------------------|-----------|---------------------------|--------------|--------------|---------------|---------------------|-------------------------|-------------|
| sample ID          | sample type | species               | location                                   | site      | locus                     | Length in bp | primers used | 1:10 dilution | 1:50 dilution       |                         | results     |
| SP 233             | B           | Ursus ingressus       | Potočka zijalka, Slovenia                  | cave      | mt                        | 103          | CB           | ++            | ++                  |                         | 12          |
| SP 243             | B           | Ursus ingressus       | Vindija layer H, Croatia                   | cave      | mt                        | 103          | CB           | + -           | - -                 |                         | 12          |
| SP 322             | B           | Ursus speleaus        | Ramesch cave, Austria                      | cave      | mt                        | 103          | CB           | ++            | - -                 |                         | 12          |
| SP 576             | B           | Ursus speleaus        | Gailenreuth, Germany                       | cave      | mt                        | 103          | CB           | ++            | (+) +               |                         | 12          |
| SP 748             | T           | Ursus speleaus        | Wildkirchli, Switzerland                   | cave      | mt                        | 103          | CB           | ++            | (+) +               |                         | 12          |
| SP 751             | T           | Ursus speleaus        | Ossenyaga cave, Russia                     | cave      | mt                        | 103          | CB           | + -           | ++                  |                         | 12          |
| SP 891             | B           | Ursus ingressus       | Gamsulzen cave, Austria                    | cave      | mt                        | 103          | CB           | ++            | ++                  |                         | 12          |
| SP 1050            | B           | Ursus speleaus        | Herrmann cave, Germany                     | cave      | mt                        | 103          | CB           | ++            | + -                 |                         | 12          |
|                    |             |                       |                                            |           | <b>1:5 dilution</b>       |              |              |               |                     |                         |             |
| SP 764             | T           | Ursus ingressus       | Nerubaskoe, Ukrain                         | cave      | mt                        | 103          | CB           | +             | +                   |                         | unpublished |
| SP 1006            | B           | Ursus speleaus        | Yana river region, Russia                  | open site | mt                        | 103          | CB           | +             | +                   |                         | unpublished |
| SP 1008            | B           | Ursus speleaus        | Akhstyrskaya cave, Russia                  | cave      | mt                        | 103          | CB           | -             | -                   |                         | unpublished |
| SP 1014            | B           | Ursus speleaus        | Kudaro, Russia                             | cave      | mt                        | 103          | CB           | -             | -                   |                         | unpublished |
| SP 1019            | B           | Ursus speleaus        | Kudaro, Russia                             | cave      | mt                        | 103          | CB           | -             | -                   |                         | unpublished |
| SP 1166            | T           | Ursus speleaus        | Strashnaya cave, Russia                    | cave      | mt                        | 103          | CB           | +             | -                   |                         | unpublished |
| SP 1167            | T           | Ursus speleaus        | Strashnaya cave, Russia                    | cave      | mt                        | 103          | CB           | -             | -                   |                         | unpublished |
| SP 1168            | T           | Ursus speleaus        | Strashnaya cave, Russia                    | cave      | mt                        | 103          | CB           | +             | -                   |                         | unpublished |
| SP 1636            | T           | Ursus speleaus        | Hovk, Armenia                              | cave      | mt                        | 103          | CB           | +             | +                   |                         | unpublished |
|                    |             |                       |                                            |           | <b>original extract</b>   |              |              |               |                     |                         |             |
| SP 1405            | B           | Mammuthus primigenius | Maasvlakte, The Netherlands                | North Sea | n                         | 56           | M61          | -             | -                   | - - - + +               |             |
|                    |             |                       |                                            |           | n                         | 44           | M199         | -             | +                   | - - - - -               |             |
|                    |             |                       |                                            |           | n                         | 46           | M901         | -             | -                   | - - - - - +             |             |
| SP 1414            | B           | Mammuthus primigenius | Siegsdorf, Germany                         | open site | n                         | 56           | M61          | -             | -                   |                         |             |
|                    |             |                       |                                            |           | n                         | 44           | M199         | -             | -                   |                         |             |
|                    |             |                       |                                            |           | n                         | 46           | M901         | -             | -                   |                         |             |
| SP 1419            | B           | Mammuthus primigenius | Olenek-Anabar interflow, Russia Permafrost | open site | n                         | 56           | M61          | +             | +                   | + + + + +               | 17          |
|                    |             |                       |                                            |           | n                         | 44           | M199         | +             | +                   | + + + + +               | 17          |
|                    |             |                       |                                            |           | n                         | 46           | M901         | +             | +                   | + + + + +               | 17          |
| SP 1420            | B           | Mammuthus primigenius | East Siberian Sea coast, Russia Permafrost | open site | n                         | 56           | M61          | -             | - - - - - + +       | - - - - - + + + + +     | 17          |
|                    |             |                       |                                            |           | n                         | 44           | M199         | -             | - - - - - + + + + + | - - - + + + + + + +     | 17          |
|                    |             |                       |                                            |           | n                         | 46           | M901         | -             | - - - - - + + + + + | - - - - - + + + + + + + | 17          |
| SP 1421            | B           | Mammuthus primigenius | Lena Delta Region, Russia Permafrost       | open site | n                         | 56           | M61          | +             | + + + + + + + + +   |                         | 17          |
|                    |             |                       |                                            |           | n                         | 44           | M199         | +             | + + + + + + + + +   |                         | 17          |
|                    |             |                       |                                            |           | n                         | 46           | M901         | +             | + + + + + + + + +   |                         | 17          |
| SP 1422            | B           | Mammuthus primigenius | Bolshoy Lyakhovsky Island                  | open site | n                         | 56           | M61          | -             | -                   |                         |             |
|                    |             |                       |                                            |           | n                         | 44           | M199         | -             | -                   |                         |             |
|                    |             |                       |                                            |           | n                         | 46           | M901         | -             | -                   |                         |             |
